# Supplementary material
Source: PubMed Central journal article supplement (PMC4032366)
Supplement: NIHMS585822-supplement-01.pdf [file NIHMS585822-supplement-01.pdf]

**Supplementary Table 2. Colorectal cancer patient characteristics**

|                              |                 | Overall survival |         |                                              |
|------------------------------|-----------------|------------------|---------|----------------------------------------------|
|                              |                 | N (%)            | P       | HR (95%CI)                                   |
| <b>Age</b>                   | ≤ 60            | 50 (33%)         | <0.0009 | 1.045 (1.018, 1.073)                         |
|                              | > 60            | 101 (67%)        |         |                                              |
| <b>Gender</b>                | Female          | 62 (41%)         | NS      | 1.049 (0.596, 1.848)                         |
|                              | Male            | 89 (59%)         |         |                                              |
| <b>T stage</b>               | T1 + T2         | 29 (19%)         | 0.036   | 0.287 (0.089, 0.924)                         |
|                              | T3 + T4         | 123 (81%)        |         |                                              |
| <b>N stage</b>               | N0              | 100 (66%)        | 0.0008  | 0.383 (0.218, 0.673)                         |
|                              | N1 + N2 + N3    | 51 (34%)         |         |                                              |
| <b>M stage</b>               | M0              | 125 (83%)        | 0.016   | 0.456 (0.241, 0.864)                         |
|                              | M1              | 26 (17%)         |         |                                              |
| <b>Differentiation</b>       | Well/moderate   | 144 (95%)        | NS      | 0.894 (0.379, 2.106)                         |
|                              | Poor            | 5 (3%)           |         |                                              |
| <b>Localization of tumor</b> | Distal colon    | 25 (17%)         | NS      | 1.476 (0.763, 2.854)<br>0.916 (0.440, 1.906) |
|                              | Proximal colon  | 100 (66%)        |         |                                              |
|                              | rectum          | 26 (17%)         |         |                                              |
| <b>DOT1L</b>                 | Low (< median)  | 65               | 0.0018  | 2.820 (1.469, 5.413)                         |
|                              | High (≥ median) | 86               |         |                                              |
| <b>H3K79me2</b>              | Low (< median)  | 70               | 0.045   | 1.835 (1.015, 3.316)                         |
|                              | High (≥ median) | 74               |         |                                              |

Table S2, related to Figure 6

**Supplementary Table 3. Colorectal cancer patient characteristics**

|                              |                | DOT1L    |          | H3K79me2 |          |
|------------------------------|----------------|----------|----------|----------|----------|
|                              |                | Low      | High     | Low      | High     |
| <b>Age</b>                   | < 60           | 25 (38%) | 25 (29%) | 24 (34%) | 22 (30%) |
|                              | > 60           | 40 (62%) | 61 (71%) | 46 (66%) | 52 (70%) |
| <b>Gender</b>                | Female         | 22 (34%) | 40 (47%) | 28 (40%) | 33 (45%) |
|                              | Male           | 43 (66%) | 46 (43%) | 42 (60%) | 41 (55%) |
| <b>T stage</b>               | T1 + T2        | 8 (12%)  | 20 (23%) | 12 (17%) | 16 (20%) |
|                              | T3 + T4        | 57 (88%) | 66 (77%) | 58 (83%) | 59 (80%) |
| <b>N stage</b>               | N0             | 39 (60%) | 61 (71%) | 41 (59%) | 52 (70%) |
|                              | N1 + N2 + N3   | 26 (40%) | 25 (29%) | 29 (41%) | 22 (30%) |
| <b>M stage</b>               | M0             | 53 (82%) | 72 (84%) | 58 (83%) | 61 (82%) |
|                              | M1             | 12 (18%) | 14 (16%) | 12 (17%) | 13 (18%) |
| <b>Differentiation</b>       | Well/moderate  | 64 (98%) | 82 (95%) | 68 (97%) | 73 (97%) |
|                              | Poor           | 1 (2%)   | 4 (5%)   | 2 (3%)   | 2 (3%)   |
| <b>Localization of tumor</b> | Distal colon   | 27 (42%) | 20 (23%) | 24 (34%) | 22 (30%) |
|                              | Proximal colon | 22 (34%) | 25 (29%) | 27 (39%) | 19 (26%) |
|                              | Rectum         | 16 (25%) | 41 (48%) | 19 (27%) | 33 (45%) |

Table S2, related to Figure 6

#### Supplementary Table 4. Multivariate survival analysis

|                        | <b>P</b> | <b>HR (95%CI)</b>    |
|------------------------|----------|----------------------|
| <b>Age</b>             | <.0001   | 1.069 (1.037, 1.102) |
| <b>Gender</b>          | NS       | 0.775 (0.420, 1.432) |
| <b>T stage</b>         | NS       | 0.420 (0.122, 1.444) |
| <b>N stage</b>         | 0.001    | 0.333 (0.170, 0.651) |
| <b>M stage</b>         | 0.051    | 0.479 (0.228, 1.004) |
| <b>Differentiation</b> | NS       | 1.141 (0.455, 2.864) |
| <b>DOT1L</b>           | 0.0008   | 3.347 (1.646, 6.806) |
| <b>H3K79me2</b>        | NS       | 1.003 (0.997, 1.010) |

Table S4, related to Figure 6

### Supplementary Table 5. Real-Time PCR Primers

| Target Gene    | Forward primer          | Reverse primer          |
|----------------|-------------------------|-------------------------|
| <i>GAPDH</i>   | CTGCCCCCTCTGCTGATG      | TCCACGATACCAAAGTTGTCATG |
| <i>NANOG</i>   | AGGAAGACAAGGTCCCGGTCAA  | GGTGCTGAGGCCTTCTGCGT    |
| <i>SOX2</i>    | ATGCACCGCTACGACG        | CTTTTGCACCCCTCCCATT     |
| <i>POU5F1</i>  | GAAGGTATTCAGCCAAACGA    | AAATTCTCCAGGTTGCCTCT    |
| <i>hulL22</i>  | CTGGCCAGGCTCAGCAACAGG   | CTTTGCTCTGGTCAAATGCAGGC |
| <i>mIL22</i>   | CCTACATGCAGGAGGTGGTG    | AAACAGCAGGTCCAGTTCCC    |
| <i>mbactin</i> | CATTGCTGACAGGATGCAGAAGG | TGCTGGAAGGTGGACAGTGAGG  |
| <i>DOT1L</i>   | TCAAGATGACCGACGACGAC    | CACCTCAGGACCAAAGGCAA    |
| <i>AFF4</i>    | CCTTCCCACCTAGCTCTCCT    | GGTGGTACTGTAGGCTTGGG    |
| <i>MLLT10</i>  | CTCTCACCCACACAACCGTA    | TGTGTTGGTCCAGGGATCTG    |

Table S5, related to Figures 1-4

**Supplementary Table 6. ChIP Primers**

| <b>Target Gene</b>    | <b>Forward primer</b>    | <b>Reverse primer</b>    |
|-----------------------|--------------------------|--------------------------|
| <b>SOX2 (-8kb)</b>    | AGTGCCCAACTTTCTAGGGC     | TGGGCCACCCACTTGTTTAG     |
| <b>SOX2 (-7kb)</b>    | TCAGACGGGCAGATAAGCAC     | TGGGCTCAATGGTGTCAAGT     |
| <b>SOX2 (-4kb)</b>    | TAAGGCCTTTTGGCTAGGGC     | TTCCACGGGCAACAAAAAGC     |
| <b>SOX2 (4kb)</b>     | ACCAGGAACCAACAATCGGG     | CTCAAGGGTGGAAAGACGCTG    |
| <b>SOX2 (6kb)</b>     | TTGTGGGAGCTCCATTGACG     | GCGGTATTTCTTGTCCCCCT     |
| <b>NANOG (-9kb)</b>   | ATAGGAGACCAAACGCGAGAA    | TCTCGGCTATGACGGTTGCT     |
| <b>NANOG (-7kb)</b>   | GACTCATCACTTTTGTGTAGCACC | ATTATGTGTTGACTACTTGGCCCT |
| <b>NANOG (-1kb)</b>   | TGTTAGTGCTGGAACCCAC      | AGACTACTCCGTGCCCATCT     |
| <b>NANOG (0.5kb)</b>  | GGCACCTGCCCTTTGAACTA     | TTTCCACCATGCCTAAGCCC     |
| <b>NANOG (4kb)</b>    | TACCTCAGCCTCCAGCAGAT     | GAGGCGATGTACGGACACAT     |
| <b>POU5F1 (-9kb)</b>  | GACGGCTCTGACTTTCACTCA    | TTGTCCACAAGAGATGGCCC     |
| <b>POU5F1 (-7kb)</b>  | GTTGTGTGCCATGATGCTCC     | GCAAGCCCCTTACGAAGTCT     |
| <b>POU5F1 (-4kb)</b>  | TAGCGGGACAGGGAAAAGTG     | CTAAAGCCCTGGTGTGGAGG     |
| <b>POU5F1 (-2kb)</b>  | CCTGGCAGATTGAGGGATGT     | ACTAGACCAGCAGCATGAGC     |
| <b>POU5F1 (1kb)</b>   | AATTGCTTACACTTGTGCGCT    | CCTGGCACCCCTTGTAGAAA     |
| <b>DOT1L (-0.5kb)</b> | GGACCGTGACTCTTATGGGG     | GGTTCGAATCCCGTCCCAG      |
| <b>DOT1L (4.5kb)</b>  | GAGCAGTTCGGAAGGGGTTT     | CATGCGGGGCTTGAGAAAAG     |
| <b>DOT1L (7.2kb)</b>  | ATCCCTGCATTGAGCCCTTC     | TTTGAACCTTCCAGGGCCAG     |
| <b>DOT1L (7.5kb)</b>  | GGGGGTAGCCCTGCTTTTAT     | GCAGCAAGCCTGGATCTTG      |
| <b>AFF4 (1kb)</b>     | CACGCACAAGCTACTGGGAT     | CTTCGACTTGCGAAGGGGAT     |
| <b>MLLT3 (10.7kb)</b> | AGTCGTCAACCACTGCAAAC     | CCCCAATTCACCCAGTGGTAA    |
| <b>MLLT10 (186kb)</b> | CAGTCAGCCTACTCATGGGAC    | ACCGCCAGTAAGGCTTCAAT     |
| <b>FOS</b>            | GCAGCCCGCGAGCAGTT        | GCCTTGCGCGTGTCCCTAATC    |

Table S6, related to Figures 3-5



**Figure S1, related to Figure 1**

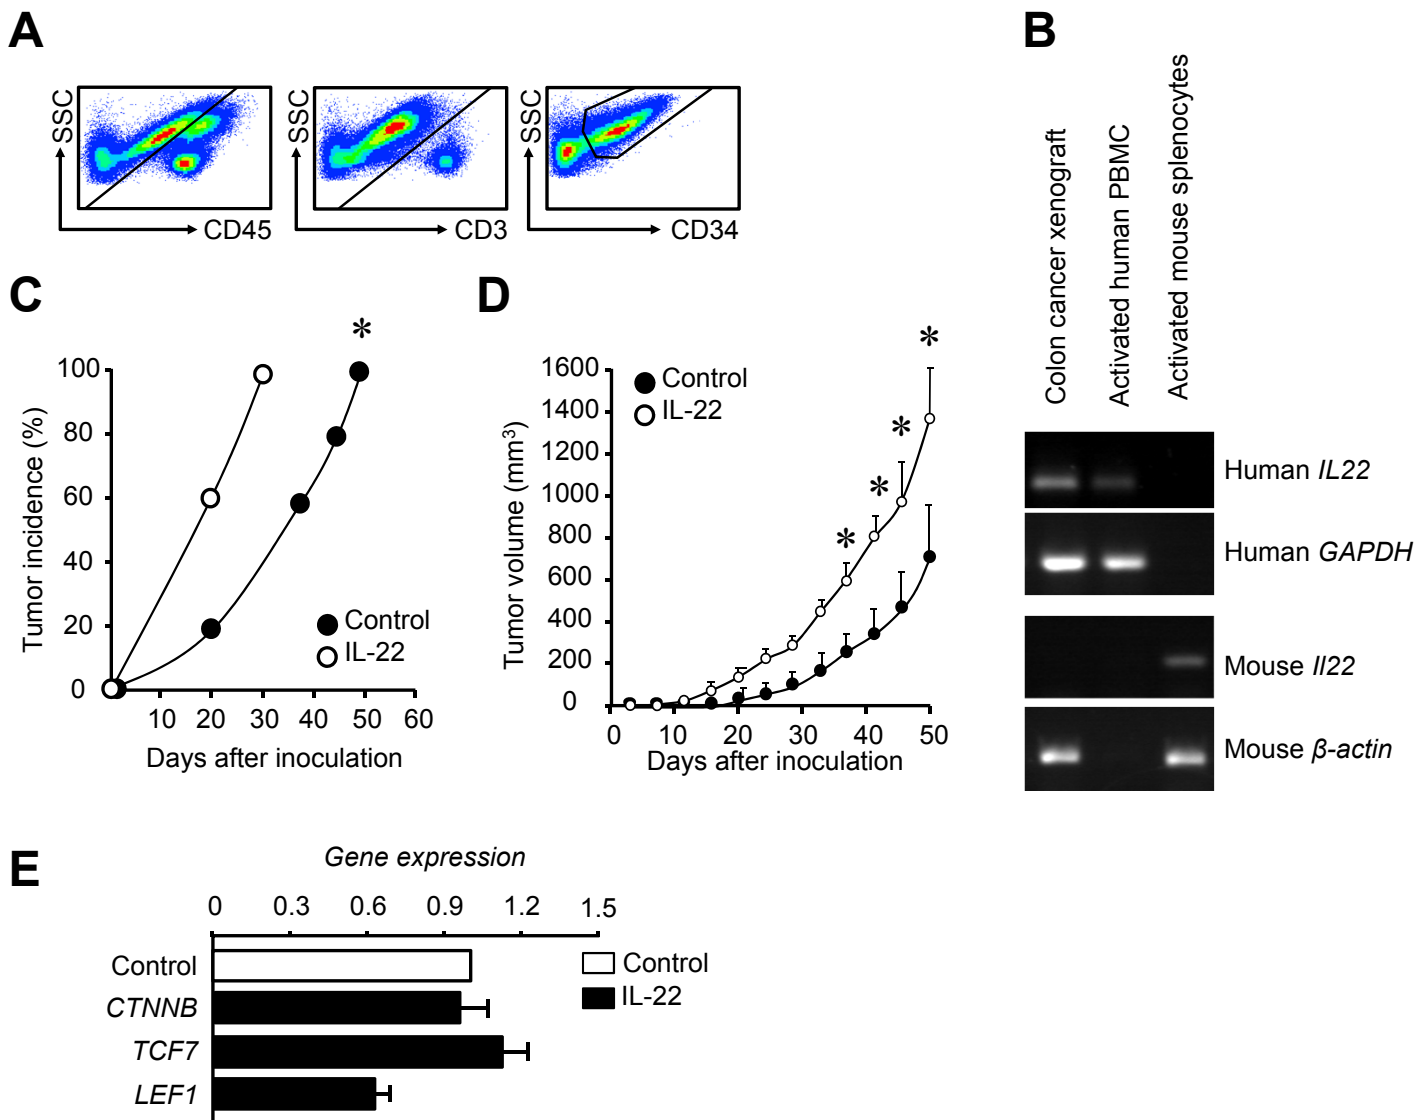

**Figure S2, related to Figure 2**

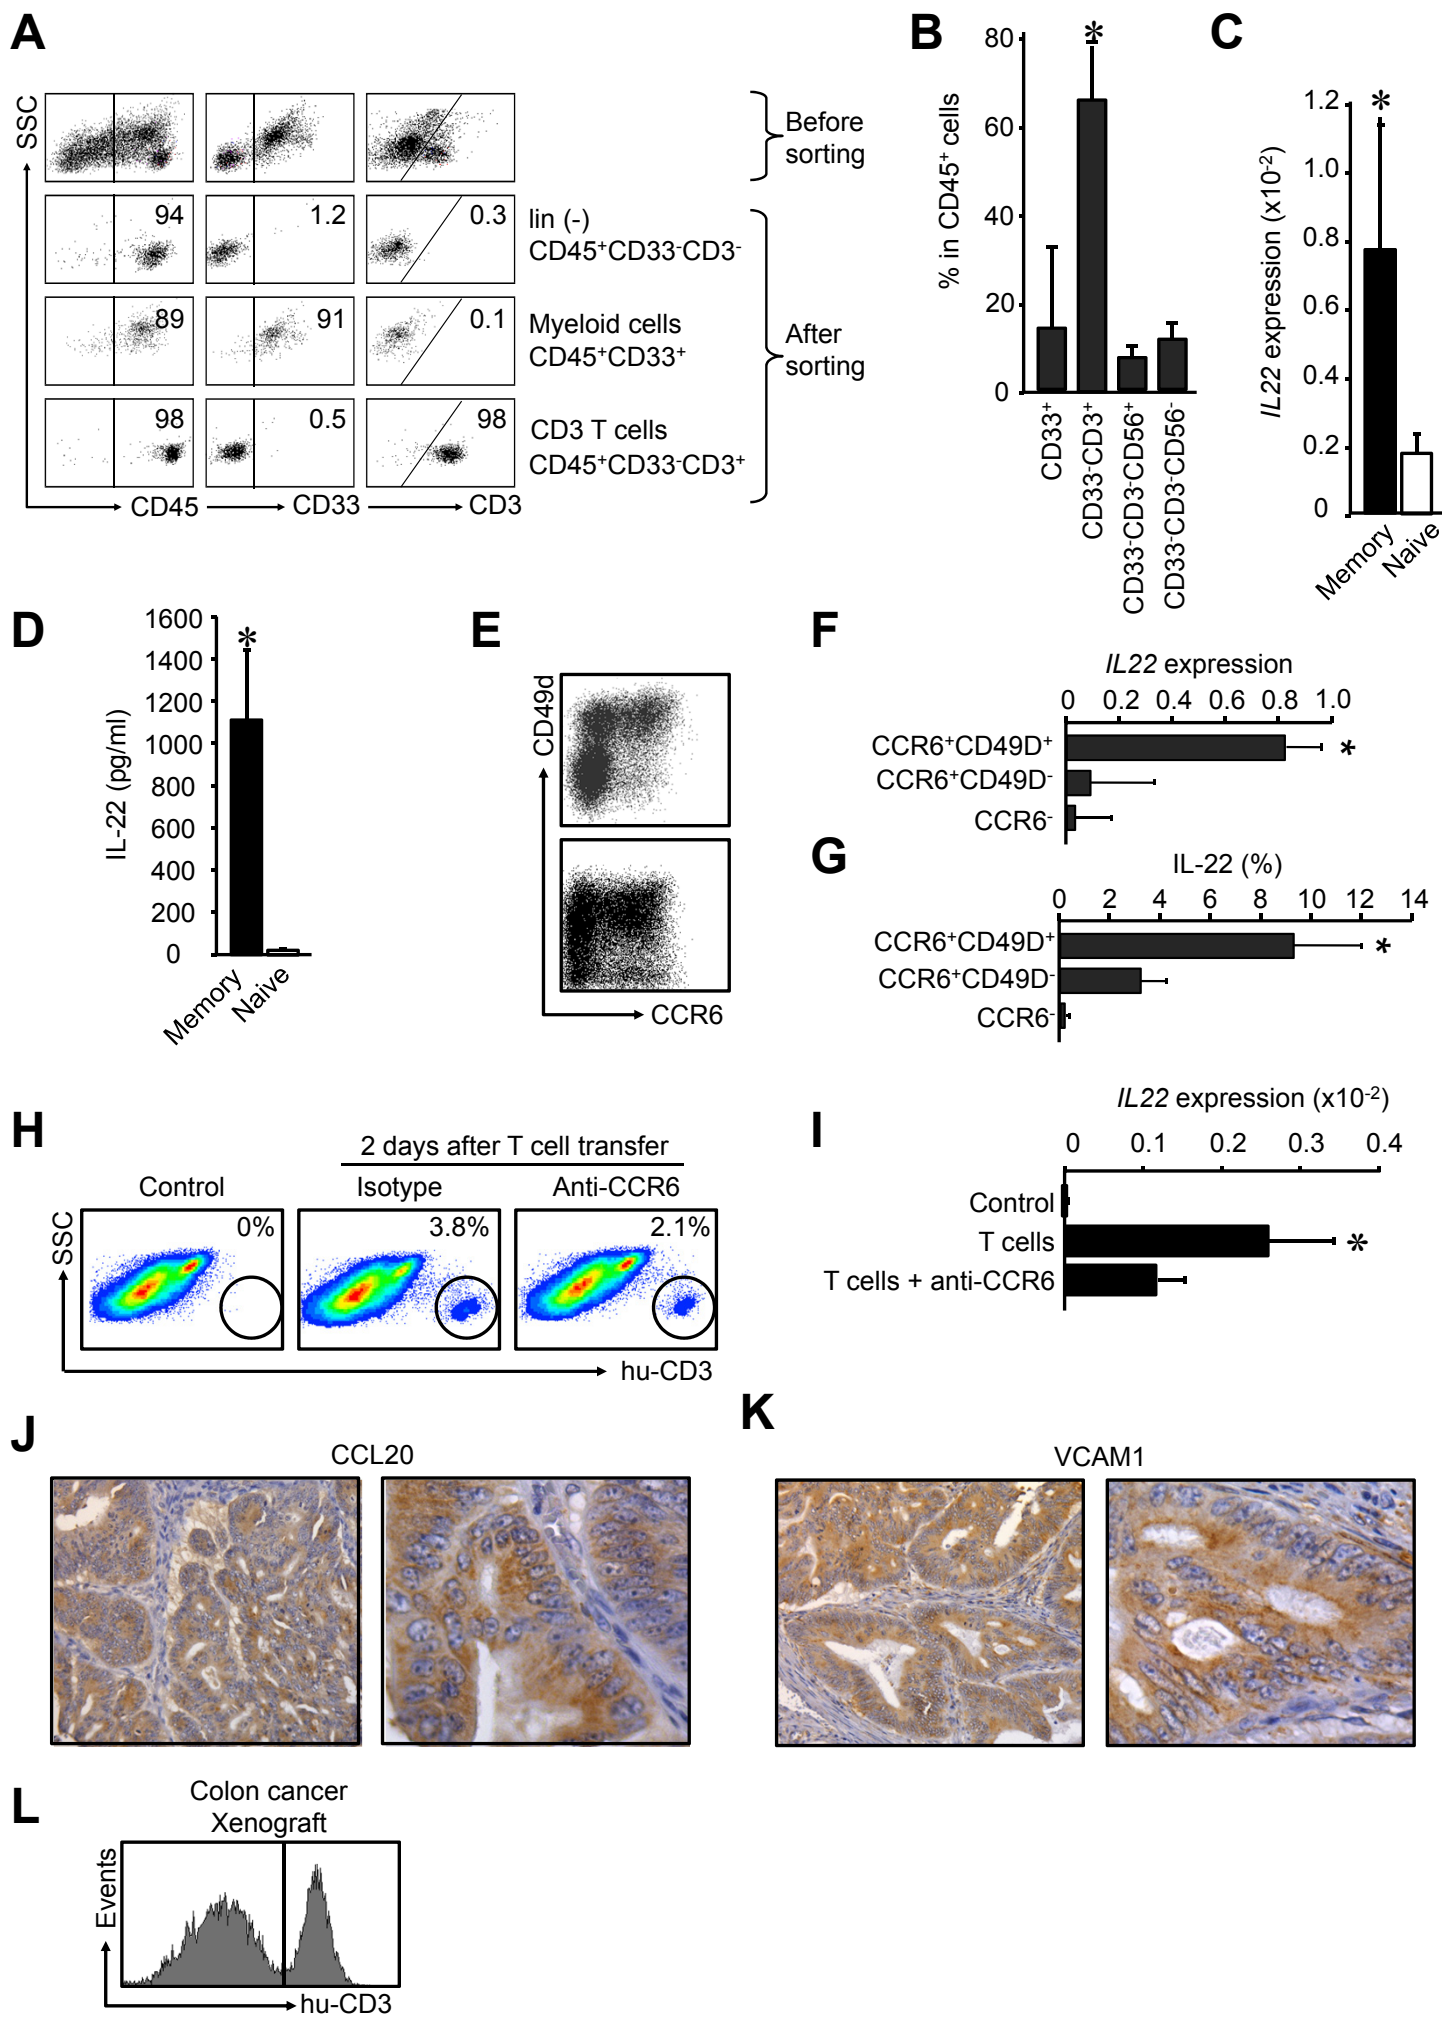



**Figure S3, related to Figure 3**

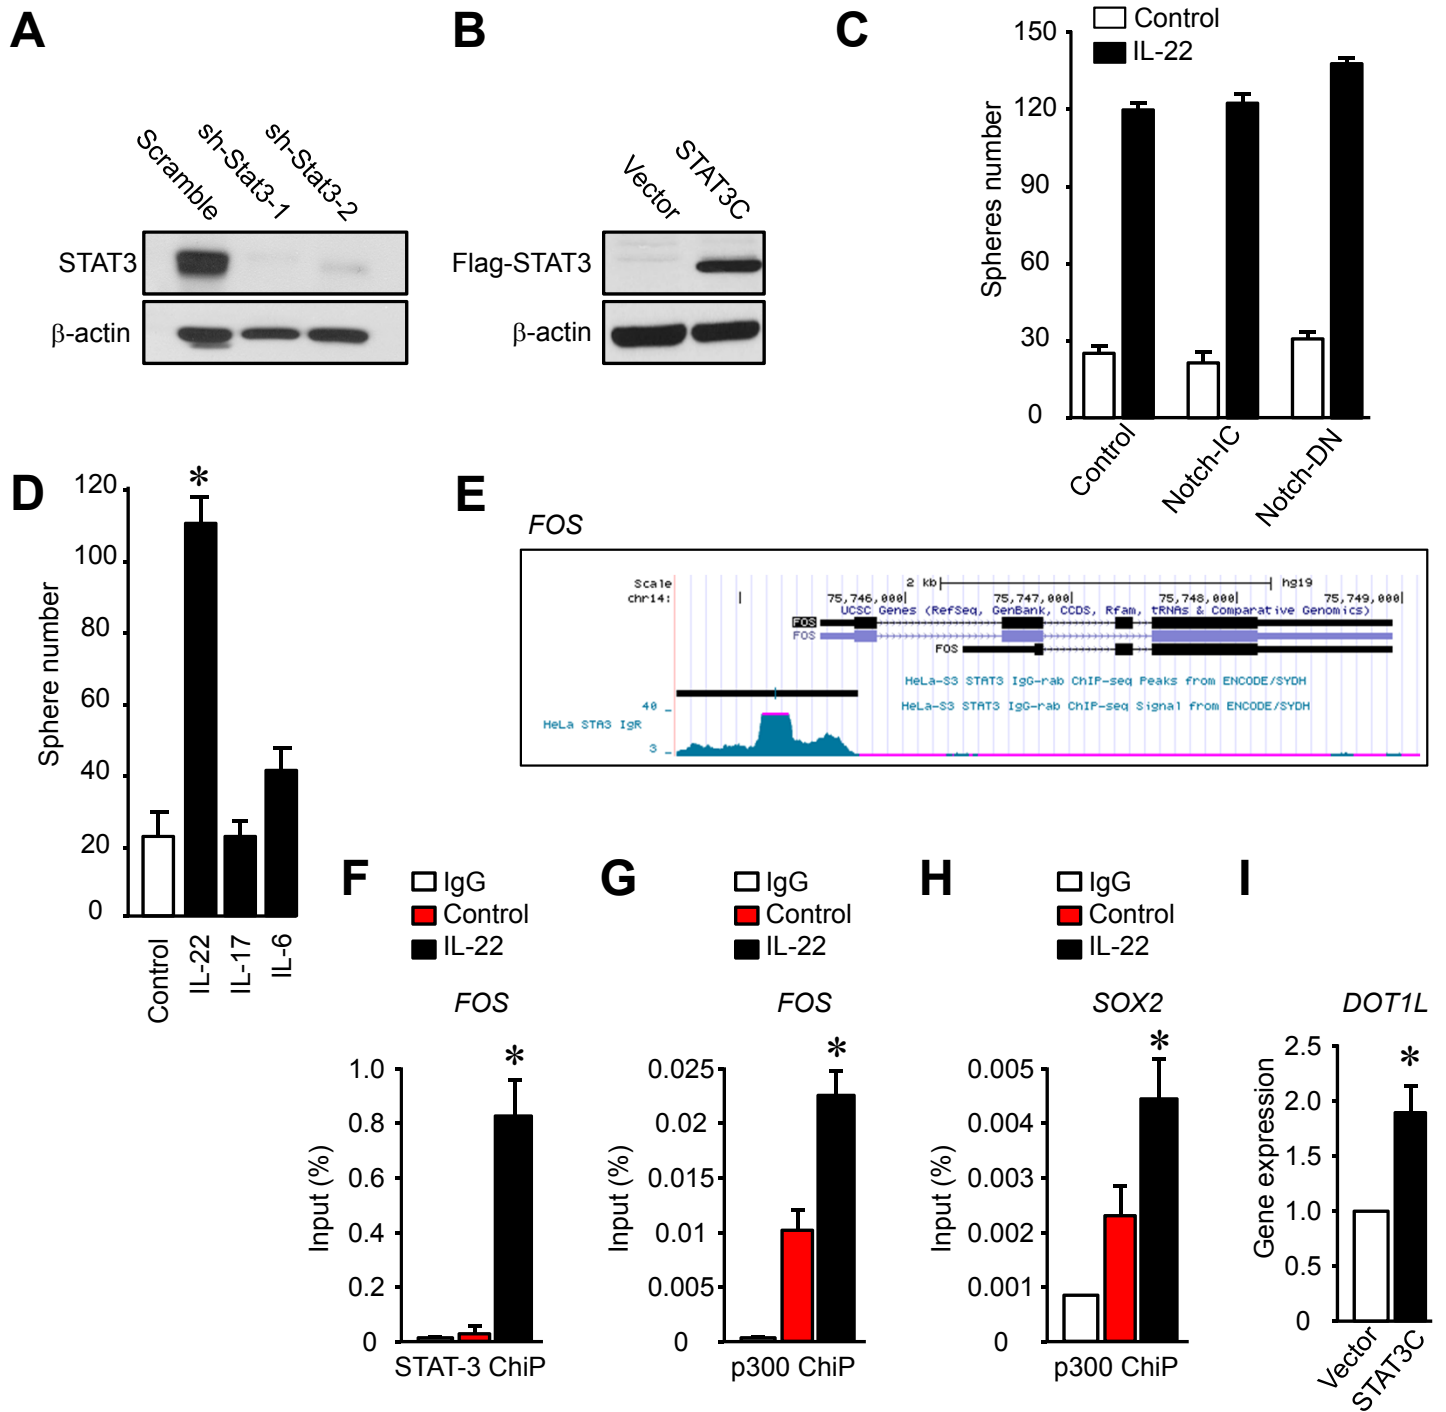

**Figure S4, related to Figure 4**

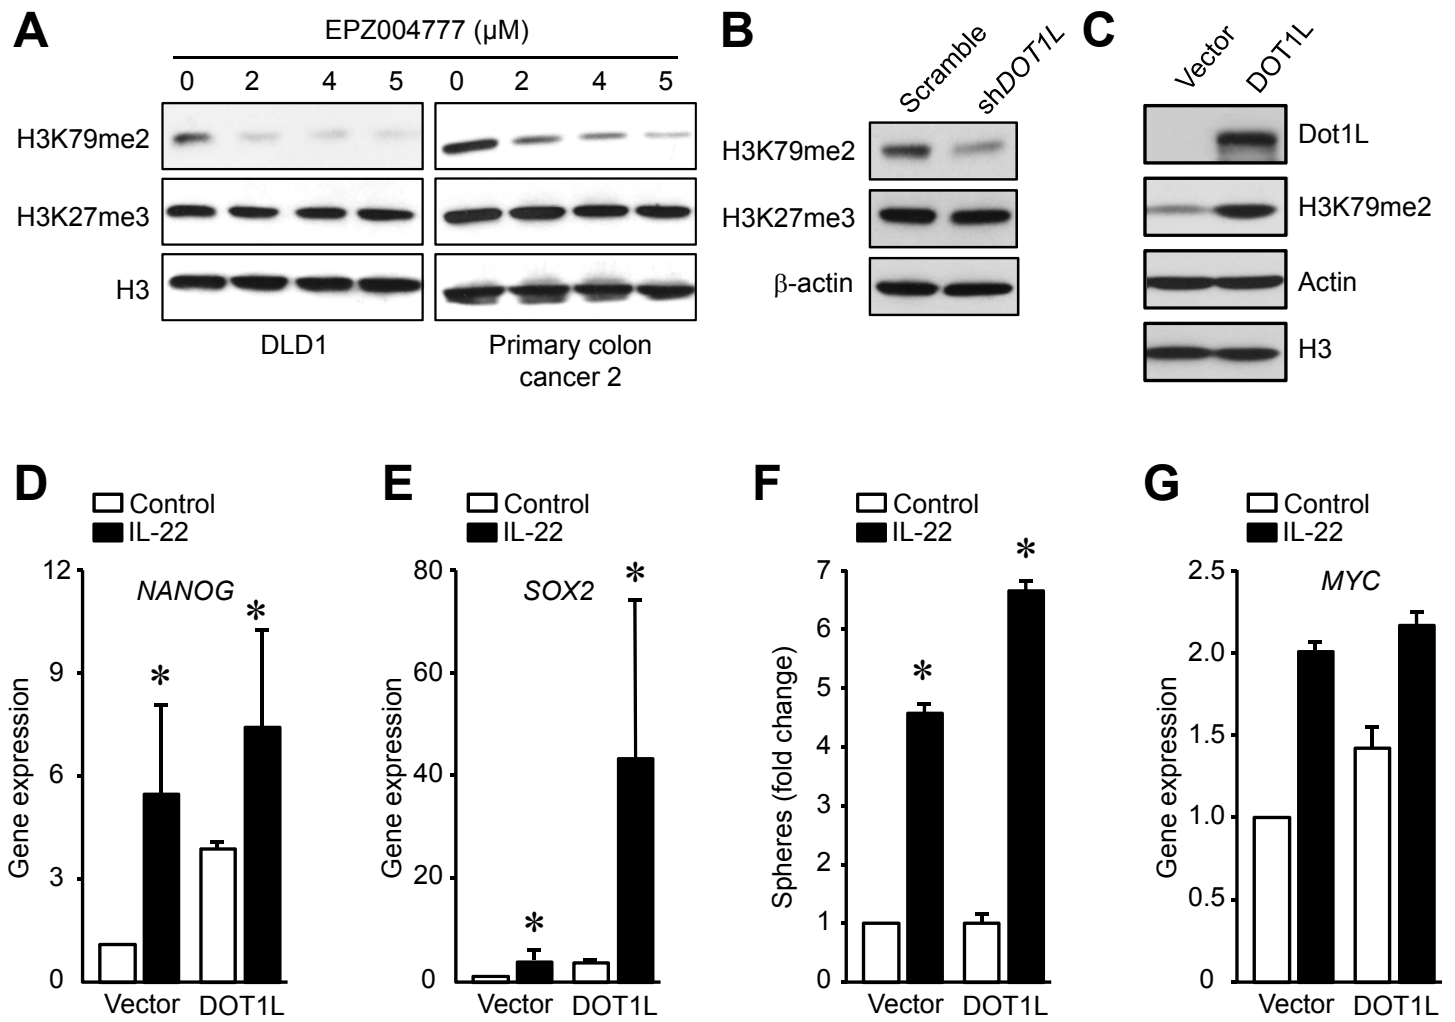



**Figure S6, related to Figure 6**

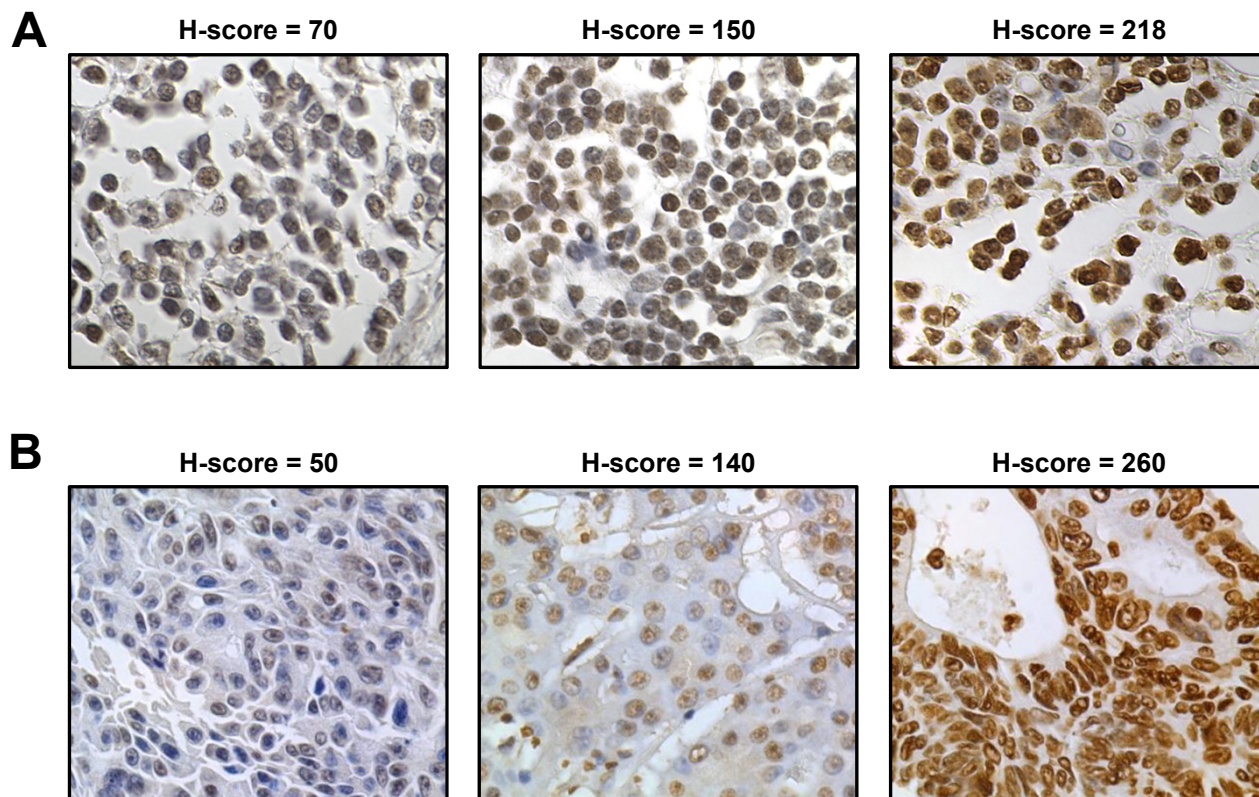

## Supplementary Information

### Supplementary figure legends

#### Figure S1, related to Figure 1 Expression and function of IL-22 expression in colon cancer tissues

**(A)** Major cellular components in fresh human colon cancer microenvironment. Single cells were prepared from fresh human colon cancer tissues and were stained for the following markers: immune cells (CD45), endothelial cells (CD33), and T cells (CD3). One of 15 is shown.

**(B)** Human and mouse IL-22 expression in the xenografted human colon cancer tissues. RT-PCR was conducted with human specific IL-22 primers or mouse specific IL-22 primers in the grafted human colon cancer tissues from NSG mice, activated human PBMCs, and wild type mouse splenocytes. One of 3 samples is shown.

**(C, D)** Effects of IL-22 on colon cancer development and growth. IL-22 treated  $10^6$  DLD-1 cells were inoculated into NSG mice. Tumor incidence (A) and tumor growth (B) were recorded.  $n = 5$  per group,  $P < 0.05$ .

**(E)** Effects of IL-22 on  $\beta$ -catenin/Wnt signaling gene expression. The expression of  $\beta$ -catenin and Wnt signaling gene expression was measured by real time PCR in IL-22-treated DLD-1 cells.  $n = 5$  per group,  $P > 0.05$ .

#### Figure S2, related to Figure 2 Phenotype and migration of IL-22<sup>+</sup>CD4<sup>+</sup> T cells in the colon cancer microenvironment

**(A, B)** Single cells were prepared from fresh colon cancer tissues and were stained for the following markers: immune cells (CD45), myeloid cells (CD33), T cells (CD3), and NK/NKT cells (CD56). **(A)** Immune cell subsets were shown before and after sorting.  $n = 5$ . **(B)** Percentage of immune cell subsets is shown as the mean  $\pm$  SEM.  $n = 10$ ,  $*P < 0.05$ .

**(C, D)** CD45RA<sup>+</sup>CD45RO<sup>-</sup> (naïve) and CD45RA<sup>-</sup>CD45RO<sup>+</sup> (memory) CD4<sup>+</sup> T cells were sorted from peripheral blood. **(C)** The expression of *IL22* was measured by real time PCR in freshly sorted cells. **(D)** The sorted cells were activated for 3 days with anti-CD3 and anti-CD28. IL-22 was detected in the culture supernatants by ELISA.  $n = 5$ ,  $*P < 0.05$ .

**(E)** CCR6 and CD49D are co-expressed in CD4<sup>+</sup> T cells. Expression of CCR6 and CD49D was analyzed in CD4<sup>+</sup> T cells by FACS. One of 4 donors is shown.

**(F, G)** CCR6<sup>+</sup>CD49d<sup>+</sup>CD4<sup>+</sup> T cells expressed IL-22. CCR6<sup>+</sup>CD49d<sup>+</sup> T cells were sorted and activated with anti-CD3 and anti-CD28 and antigen presenting cells (APC). IL-22 mRNA was detected by real time PCR **(F)**. IL-22 protein was detected by intracellular staining **(G)**. 5 different donors ( $P < 0.05$ )

**(H, I)** CCR6<sup>+</sup>CD49d<sup>+</sup>CD4<sup>+</sup> T cells migrated into colon cancer in vivo. CCR6<sup>+</sup>CD49d<sup>+</sup> T cells were injected into DLD-1 bearing NSG mice with anti-CCR6 or isotype. After 48 hours, tumor infiltrating human T cells were detected by FACS **(H)** and human IL-22 mRNA **(I)** was detected by real time PCR in the DLD-1 tissue. 3 independent experiments (P < 0.05).

**(J, K)** Colon cancer tissues express CCL20 and VCAM-1. Immunohistochemistry staining was performed with anti-CCL20 **(J)** and anti-VCAM-1 **(K)** mAbs. n = 5. Magnification: x100 (left panel) and x400 (right panel).

**(L)** Human T cells were detected in the grafted colon cancer in NSG mice. Fresh human colon cancer environmental cells were transferred into NSG mice. Human T cells were detected by FACS in the grafted human colon cancer tissues on day 54. One of 3 independent experiments is shown.

**Figure S3, related to Figure 3 Manipulation of STAT3 expression with shRNA and overexpression.**

**(A, B)** STAT3 manipulation. DLD1 cells were transfected with control vectors or sh-STAT3-1 and sh-STAT3-2 (A) or STAT3 active domain (STAT3C) (B). STAT3 expression was detected by western blotting.

**(C)** Effects of NOTCH signaling on IL-22-mediated colon cancer sphere formation. Sphere assays were performed with DLD-1 cells expressing Notch active domain (Notch-IC) or Notch negative domain (Notch-DN) in the presence of IL-22. Results are shown as the mean numbers of spheres in triplicates. (n = 4. P > 0.05).

**(D)** Effects of IL-6, IL-17 and IL-22 on colon cancer sphere formation. Sphere assays were performed with DLD-1 cells in the presence of cytokines. Results are shown as the mean numbers of spheres in triplicates. (n = 4. \*, P < 0.01).

**(E)** ENCODE STAT3-ChIP-Seq data base analysis. Based on the ENCODE STAT3-ChIP-Seq data base (Access number: GSM935557), STAT3 occupancy on the proximal promoter area of *FOS* is shown.

**(F, G)** IL-22 causes higher occupancy of STAT3 and p300 on the *FOS* promoter. STAT3-ChIP and p300-ChIP assays were performed in DLD-1 colon cancer cells cultured with IL-22. One of 3 experiments is shown. (\*, P < 0.01).

**(H)** IL-22 causes higher occupancy of p300 on the *SOX2* promoter. p300-ChIP assay was performed in DLD-1 colon cancer cells cultured with IL-22. One of 3 experiments is shown. (\*, P < 0.01).

**(I)** STAT3 activation causes increased DOT1L expression. STAT3C expressing colon cancer cells were cultured with IL-22. DOT1L expression was quantified by real-time PCR. One of 3 experiments is shown. (\*, P < 0.01).

**Figure S4, related to Figure 4 Manipulation of DOT1L and H3K79me2.**

**(A)** EPZ004777 specifically inhibits H3K79 dimethylation. DLD-1 and primary colon cancer cells (#2) were cultured with different concentrations of EPZ004777. Histone marks were detected by western blotting. One of 4 experiments is shown.

**(B)** DOT1L expression is knocked down via shRNA. Colon cancer cells were transfected with control vectors or the shDOT1L vector. Histone marks were detected by western blotting.

**(C)** DOT1L overexpression. Colon cancer cells were transfected with control vectors or the DOT1L vector. Histone marks were detected by western blotting.

**(D, E)** Effects of DOT1L overexpression on core stemness genes. Colon cancer cells were transfected with control vectors or the DOT1L vector, and treated with IL-22. Core stemness genes were quantified by real-time PCR. n = 3. \*, P < 0.05.

**(F)** Effects of DOT1L overexpression on sphere formation. Sphere assay was conducted with the vector or the DOT1L vector expressing colon cancer cells in the presence of IL-22. Sphere numbers were recorded. n = 3. \*, P < 0.05.

**(G)** Effects of DOT1L on *MYC* expression. Colon cancer cells were transfected with control vectors or the DOT1L vector, and treated with IL-22. *MYC* expression was quantified by real-time PCR. One of 3 experiments is shown. (P > 0.05).

**Figure S5, related to Figure 5 ENCODE STAT3-ChIP-Seq data base analysis.**

Based on the ENCODE STAT3-ChIP-Seq data base (Access number: GSM935557), STAT3 occupancy on the promoter areas of *DOT1L* (A), *AFF4* (B), *MLLT3* (C) and *MLLT10* (D) is shown.

**Figure S6, related to Figure 6 Immunohistochemical DOT1L and H3K79me3 scoring in colorectal cancers tissues**

Colon cancer tissues were stained with anti-DOT1L antibody **(A)** and anti-H3K79me2 antibody **(B)**. Nuclear DOT1L<sup>+</sup> and H3K79me2<sup>+</sup> tumor cells were quantified with the H-score as described in Methods. < the median values were considered low DOT1L expression, and ≥ the median values were considered high DOT1L and H3K79me2 expression. Magnification: 400X
